# Supplementary material for: Synthesis of cholesterol-reducing sterol esters by enzymatic catalysis in bio-based solvents or solvent-free
Source: Royal Society of Chemistry journal article supplement (doi:10.1039/c6ra10275a), 2016-01-01
Supplement: c6ra10275a1.pdf [file c6ra10275a1.pdf]

## Synthesis of cholesterol-reducing sterol esters by enzymatic catalysis in bio-based solvents or solvent-free

Adrienne Gallant Lanctôt<sup>a</sup>, Thomas M. Attard<sup>a</sup>, James Sherwood<sup>a</sup>, Con R. McElroy<sup>a</sup> and Andrew J. Hunt<sup>a\*</sup>

<sup>a</sup> Green Chemistry Centre of Excellence, Department of Chemistry, The University of York, Heslington, York, YO10 5DD, UK. Tel: +44 (0)1904 322546; E-mail: [andrew.hunt@york.ac.uk](mailto:andrew.hunt@york.ac.uk)

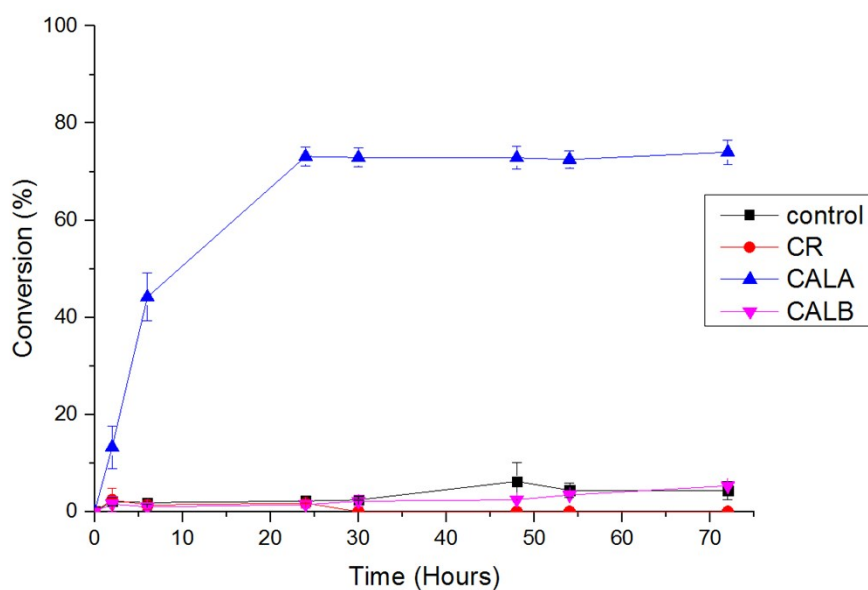

**Figure S1.** Kinetic screening of the esterification of  $\beta$ -sitosterol using different lipase enzymes. The control experiment contained no enzyme. CR= *Candida rugosa*, CALA= *Candida antarctica* lipase A, CALB= *Candida antarctica* lipase B.

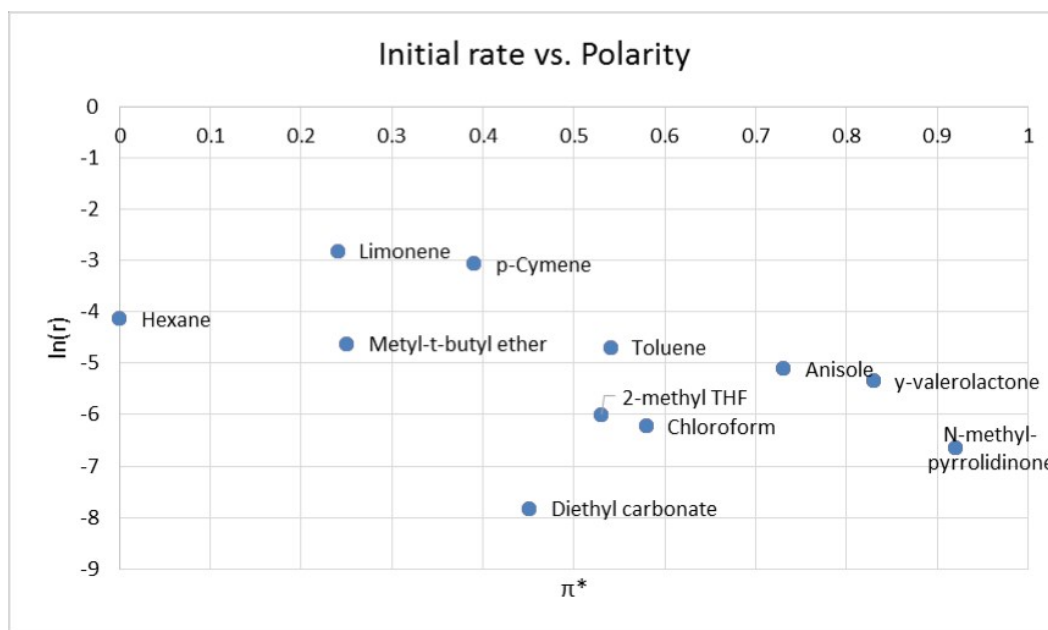

Figure S2: Plot of the natural logarithm of the initial reaction rate in different solvents versus their polarity. No correlation is seen.

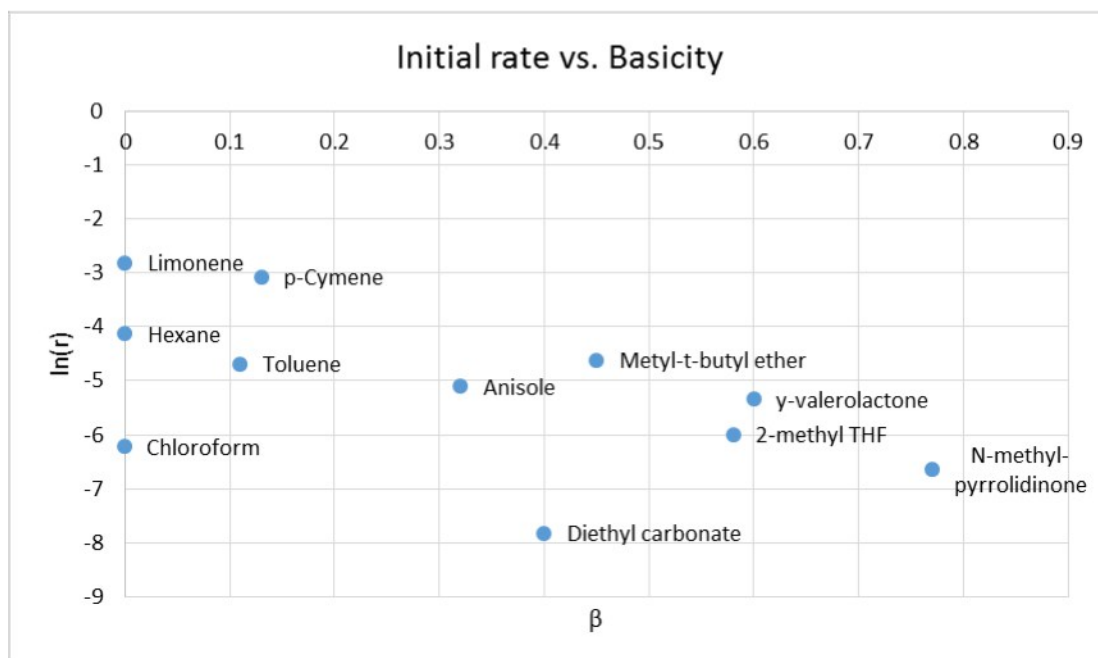

Figure S3: Plot of the natural logarithm of the initial reaction rate in different solvents versus their basicity. No correlation is seen.

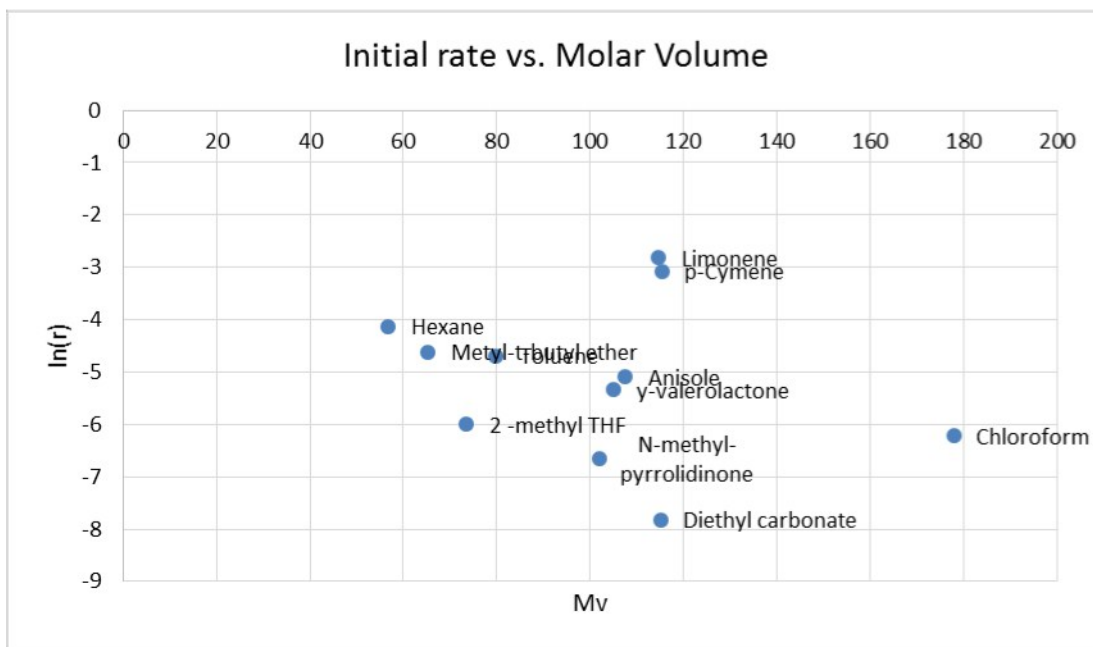

Figure S4: Plot of the natural logarithm of the initial reaction rate in different solvents versus their molar volume. No correlation is seen.

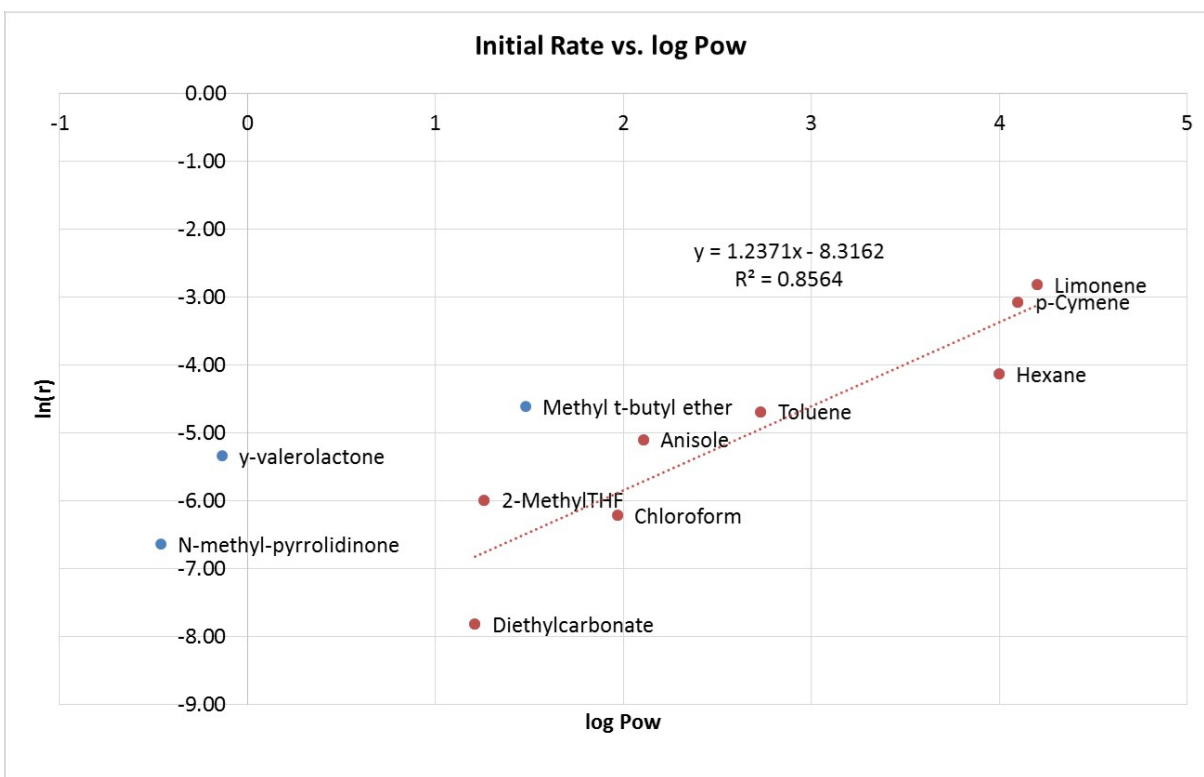

Figure S5: Plot of the natural logarithm of the initial reaction rate in different solvents versus

their partitioning coefficient. A correlation is seen with an  $R^2 = 0.86$ . The solvents that follow the trend are shown in red. The three outliers are shown in blue.

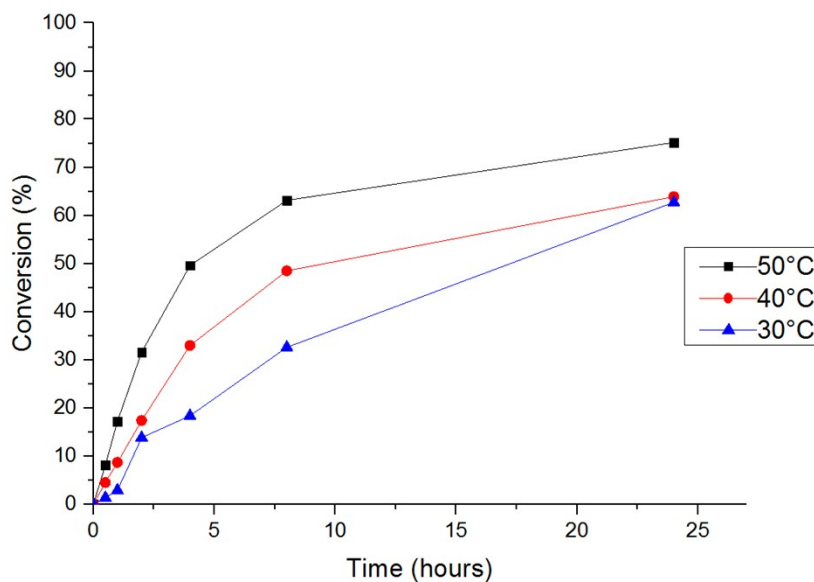

Figure S6. Kinetic study of the esterification of  $\beta$ -sitosterol at different reaction temperatures.

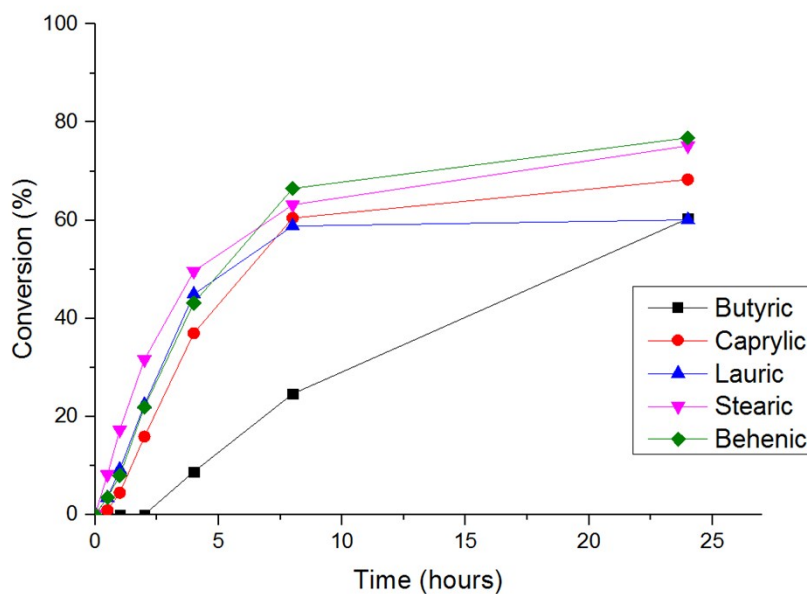

Figure S7. Kinetic study of the esterification of  $\beta$ -sitosterol with different acyl donors. Butyric acid (C4:0); Caprylic acid (C8:0); Lauric acid (C12:0); Stearic acid (C16:0) and Behenic acid (C22:0).

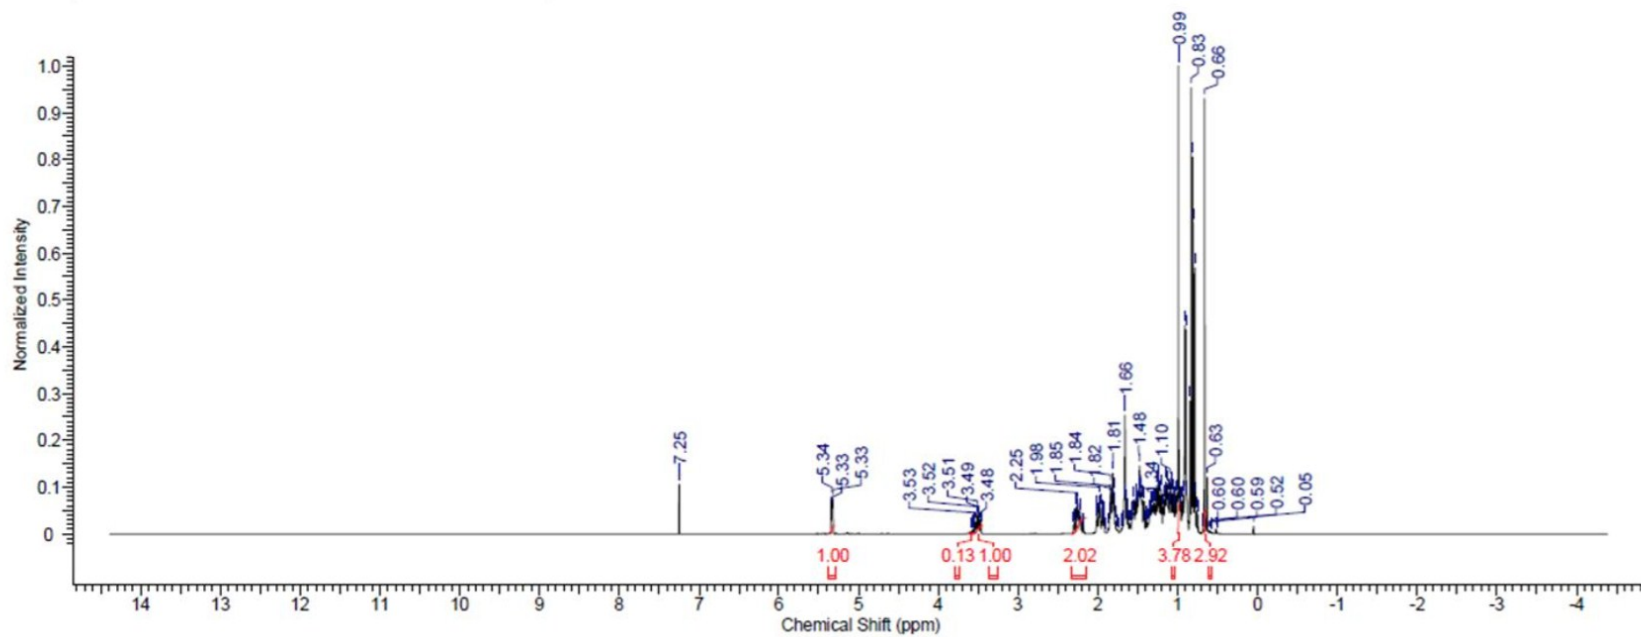

Figure S8. <sup>1</sup>H NMR spectrum of β-sitosterol.

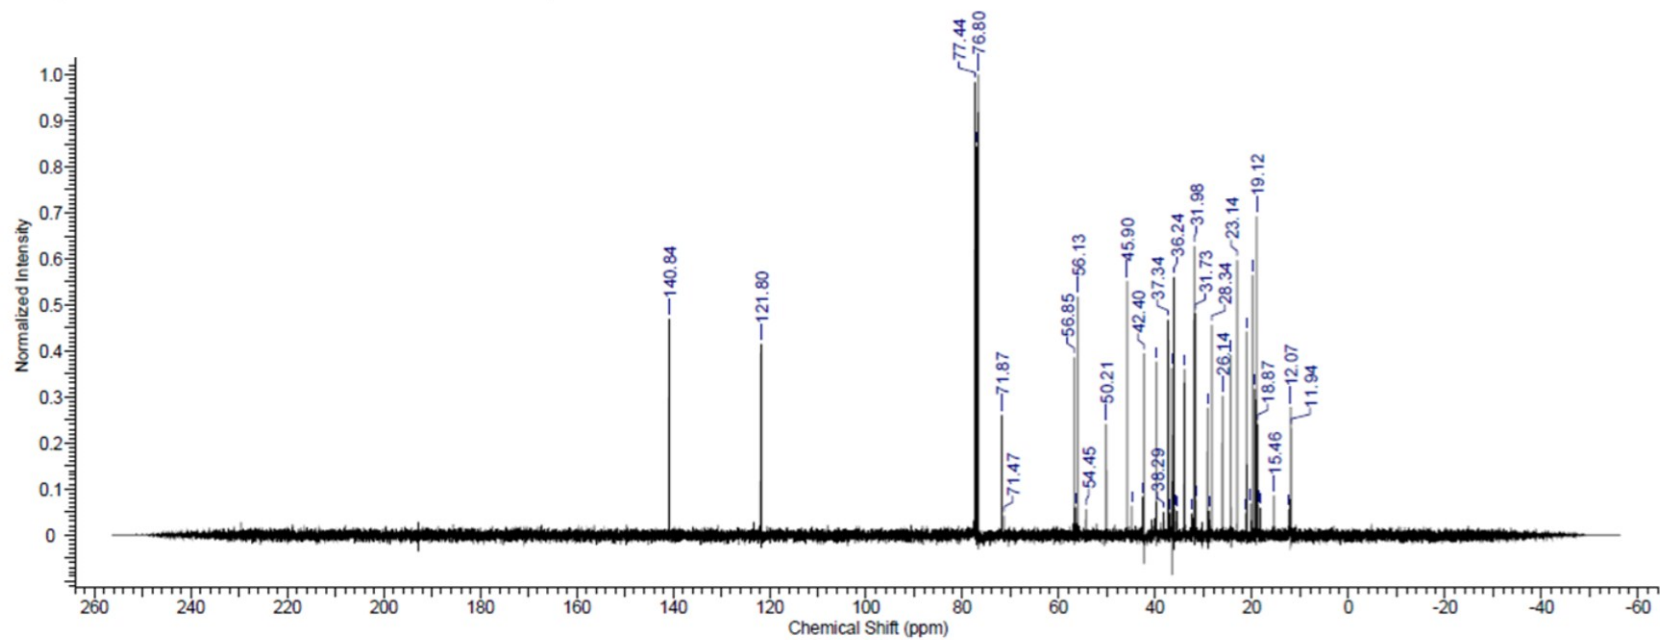

Figure S9. <sup>13</sup>C NMR spectrum of β-sitosterol.

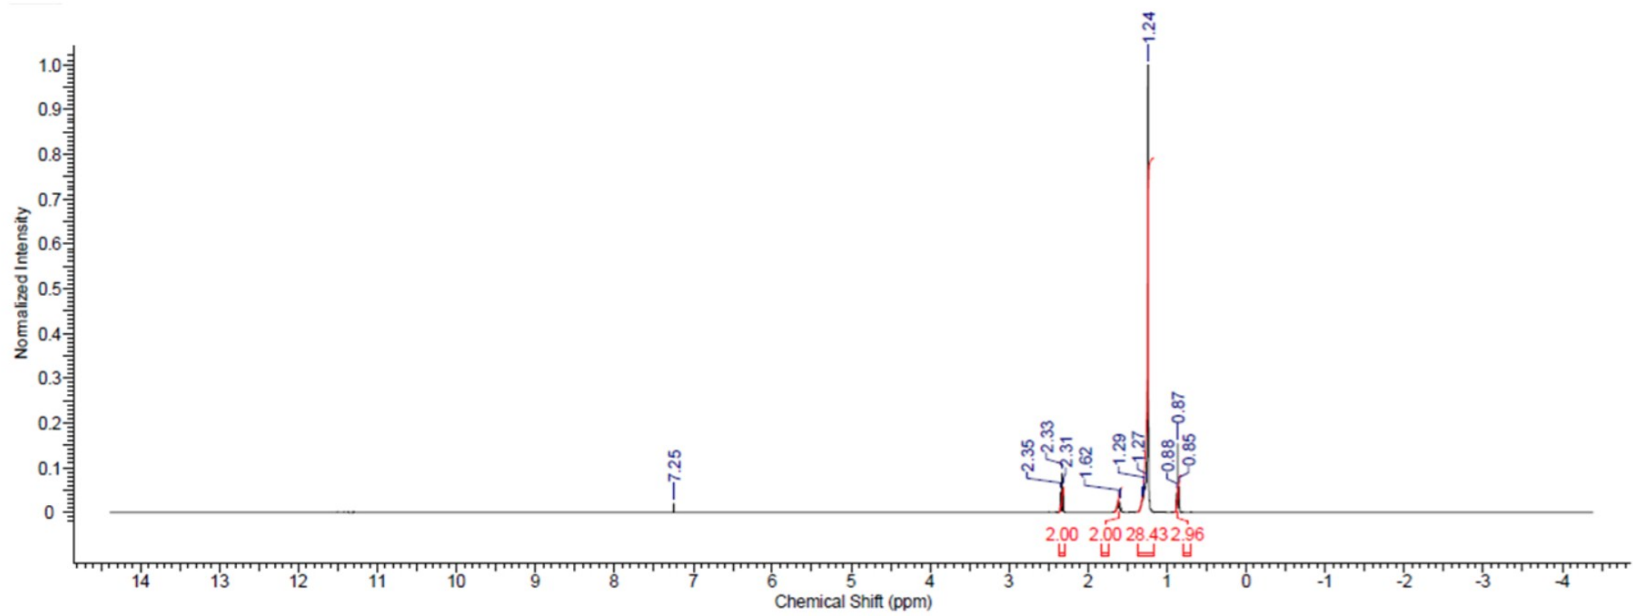

Figure S10.  $^1\text{H}$  NMR spectrum of Stearic acid.

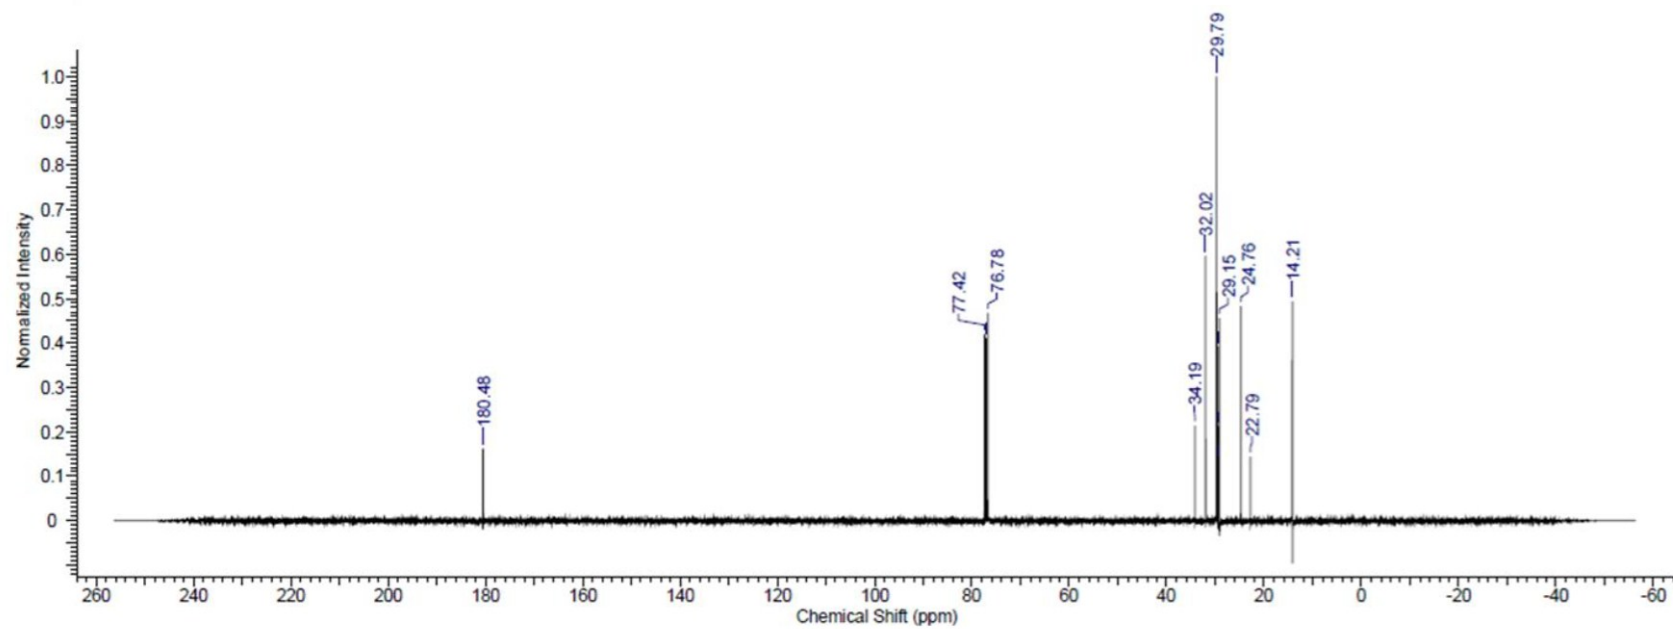

Figure S11.  $^{13}\text{C}$  NMR spectrum of Stearic acid.



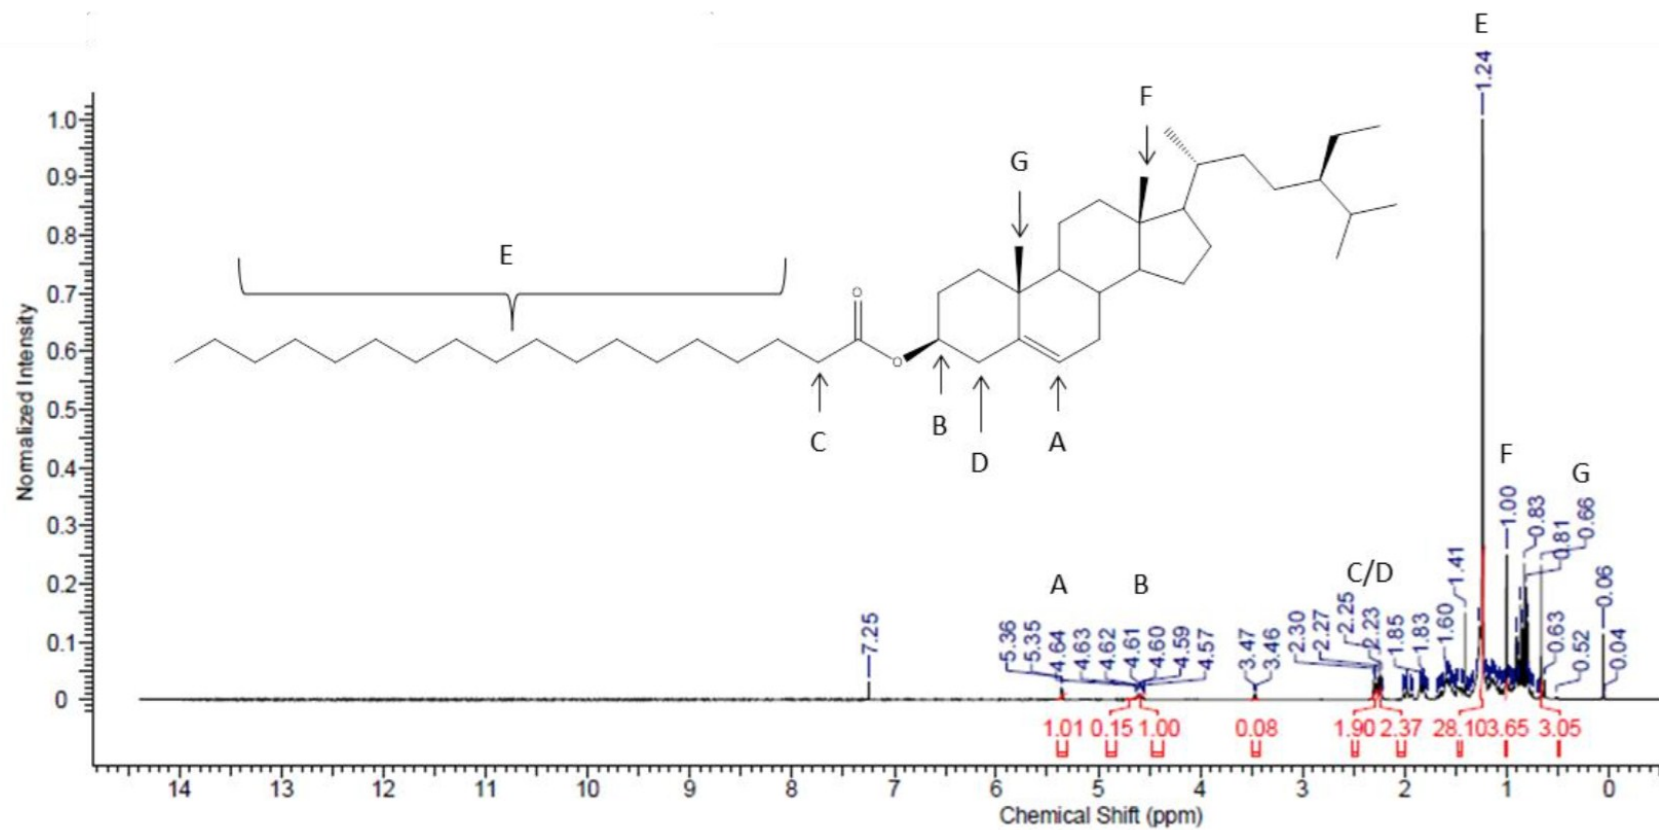

Figure S12. <sup>1</sup>H NMR spectrum of β-sitosterol ester. Characteristic peaks assigned to protons by A-F.

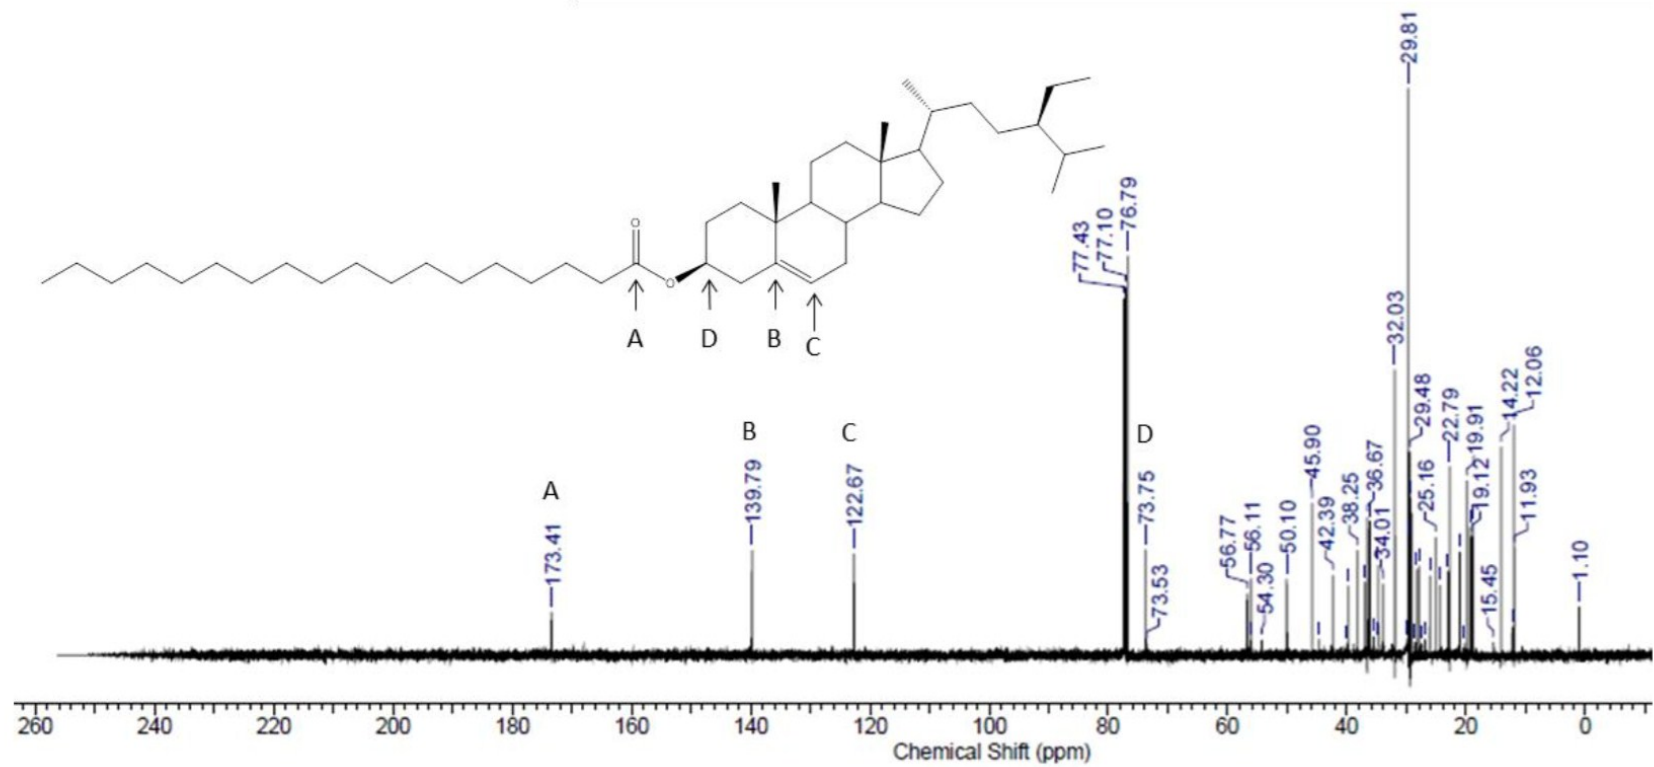

Figure S13.  $^{13}\text{C}$  NMR spectrum  $\beta$ -sitosterol ester. Characteristic peaks assigned to carbons by A-D.
